# Supplementary material for: Aberrant palmitoylation caused by a ZDHHC21 mutation contributes to pathophysiology of Alzheimer’s disease
Source: Springer Nature journal article supplement (doi:10.1186/s12916-023-02930-7), 2023-06-26
Supplement: MOESM1 [file 25537812]

Supplementary Figure 1. Construction of ZDHHC21<sup>T209S/T209S</sup> mice.

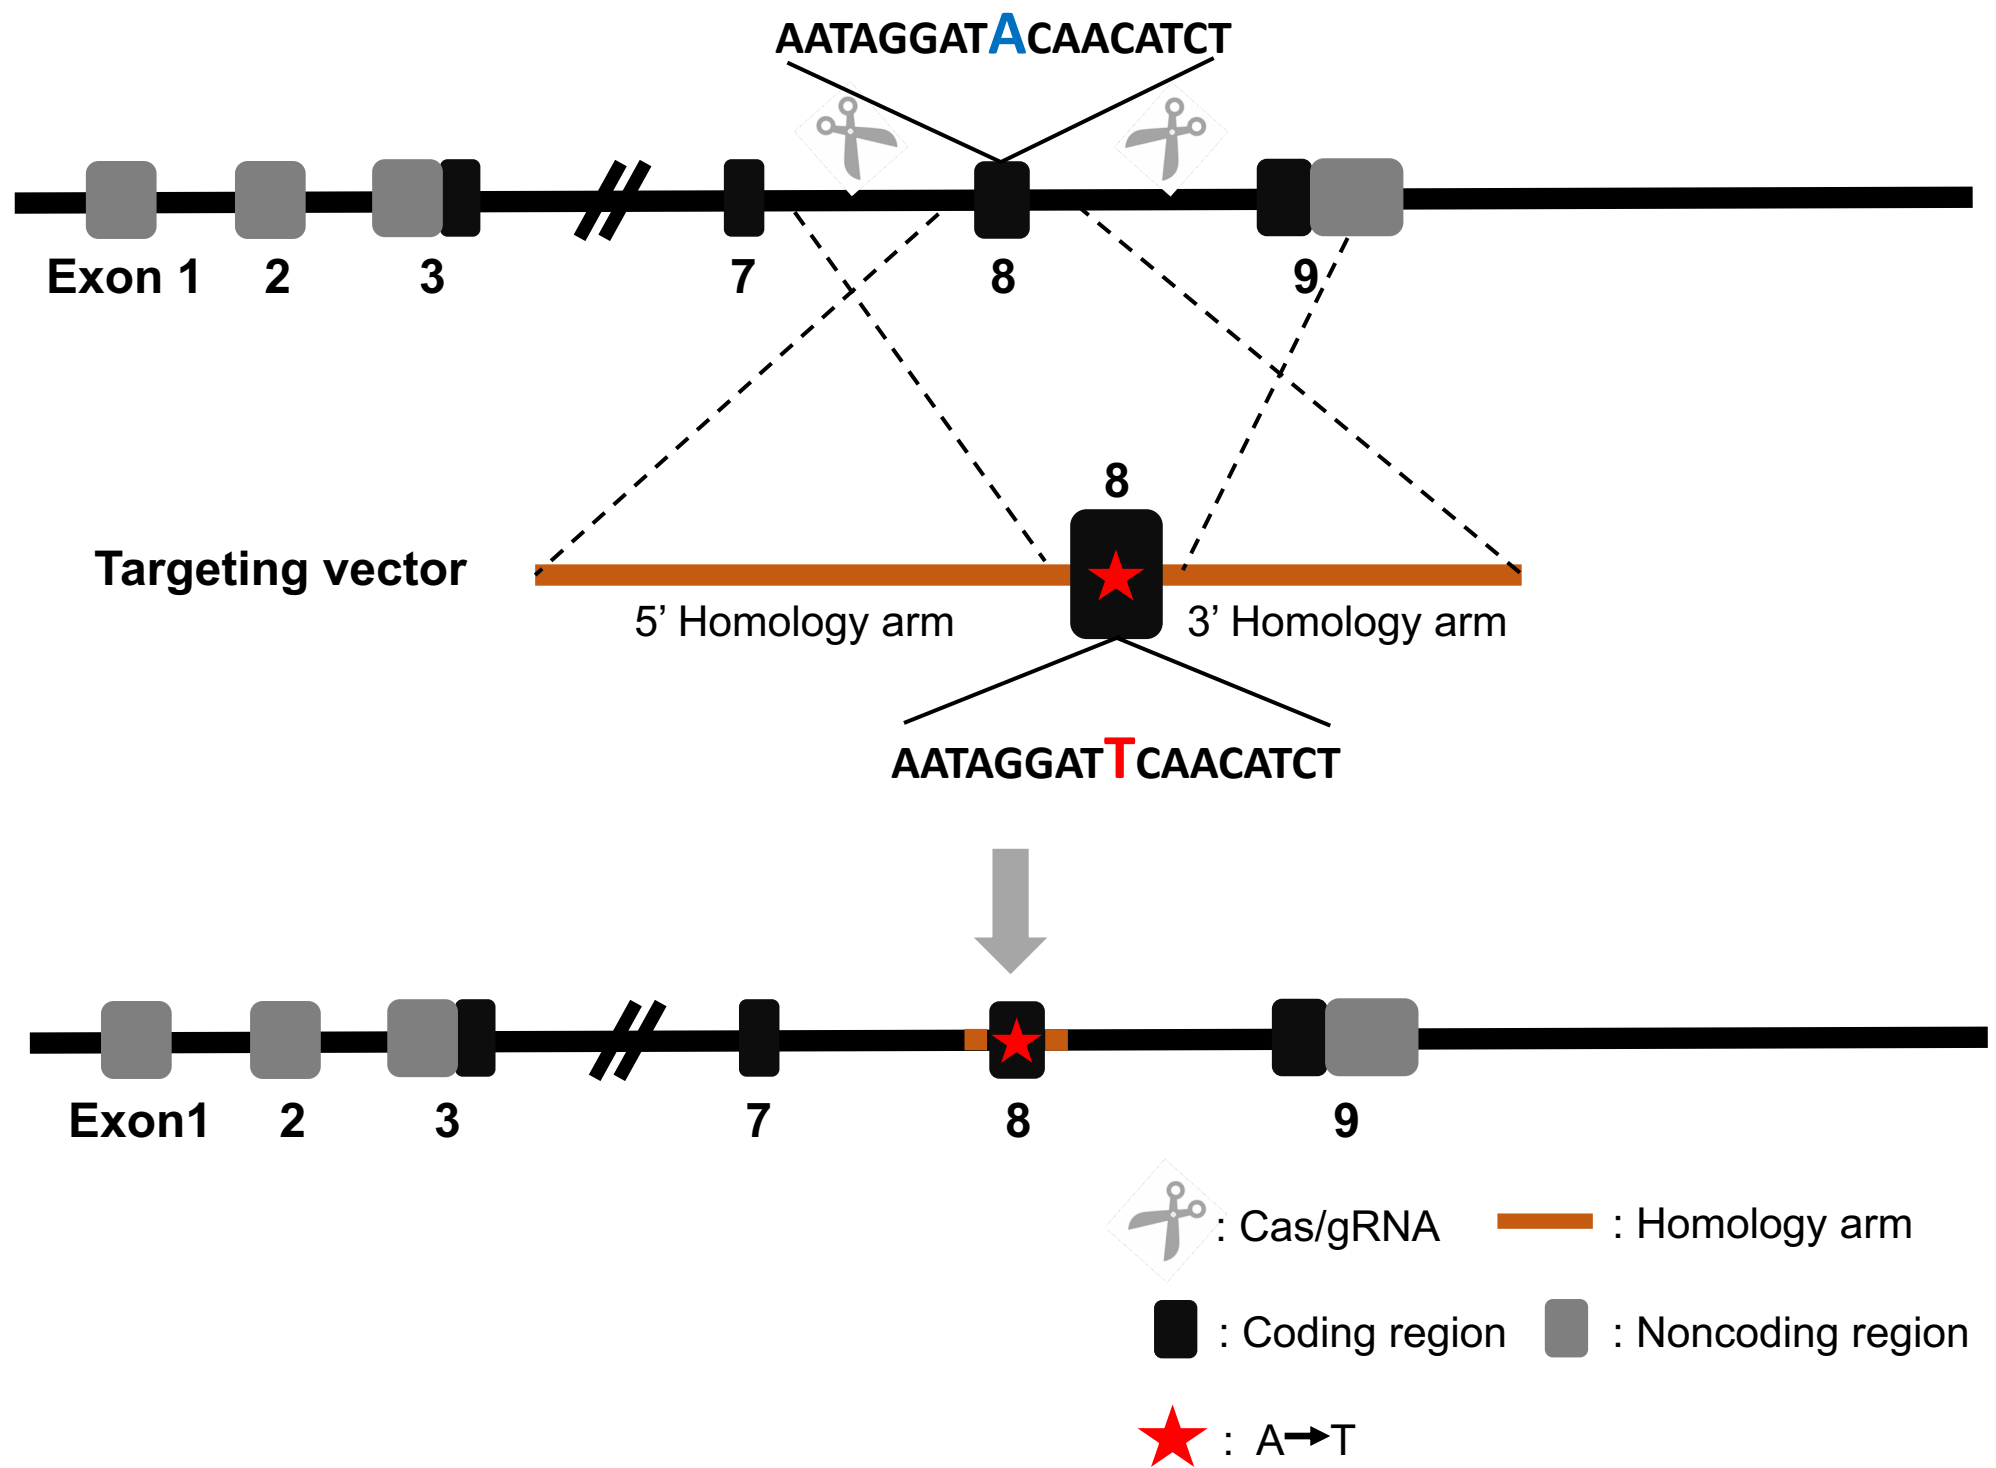

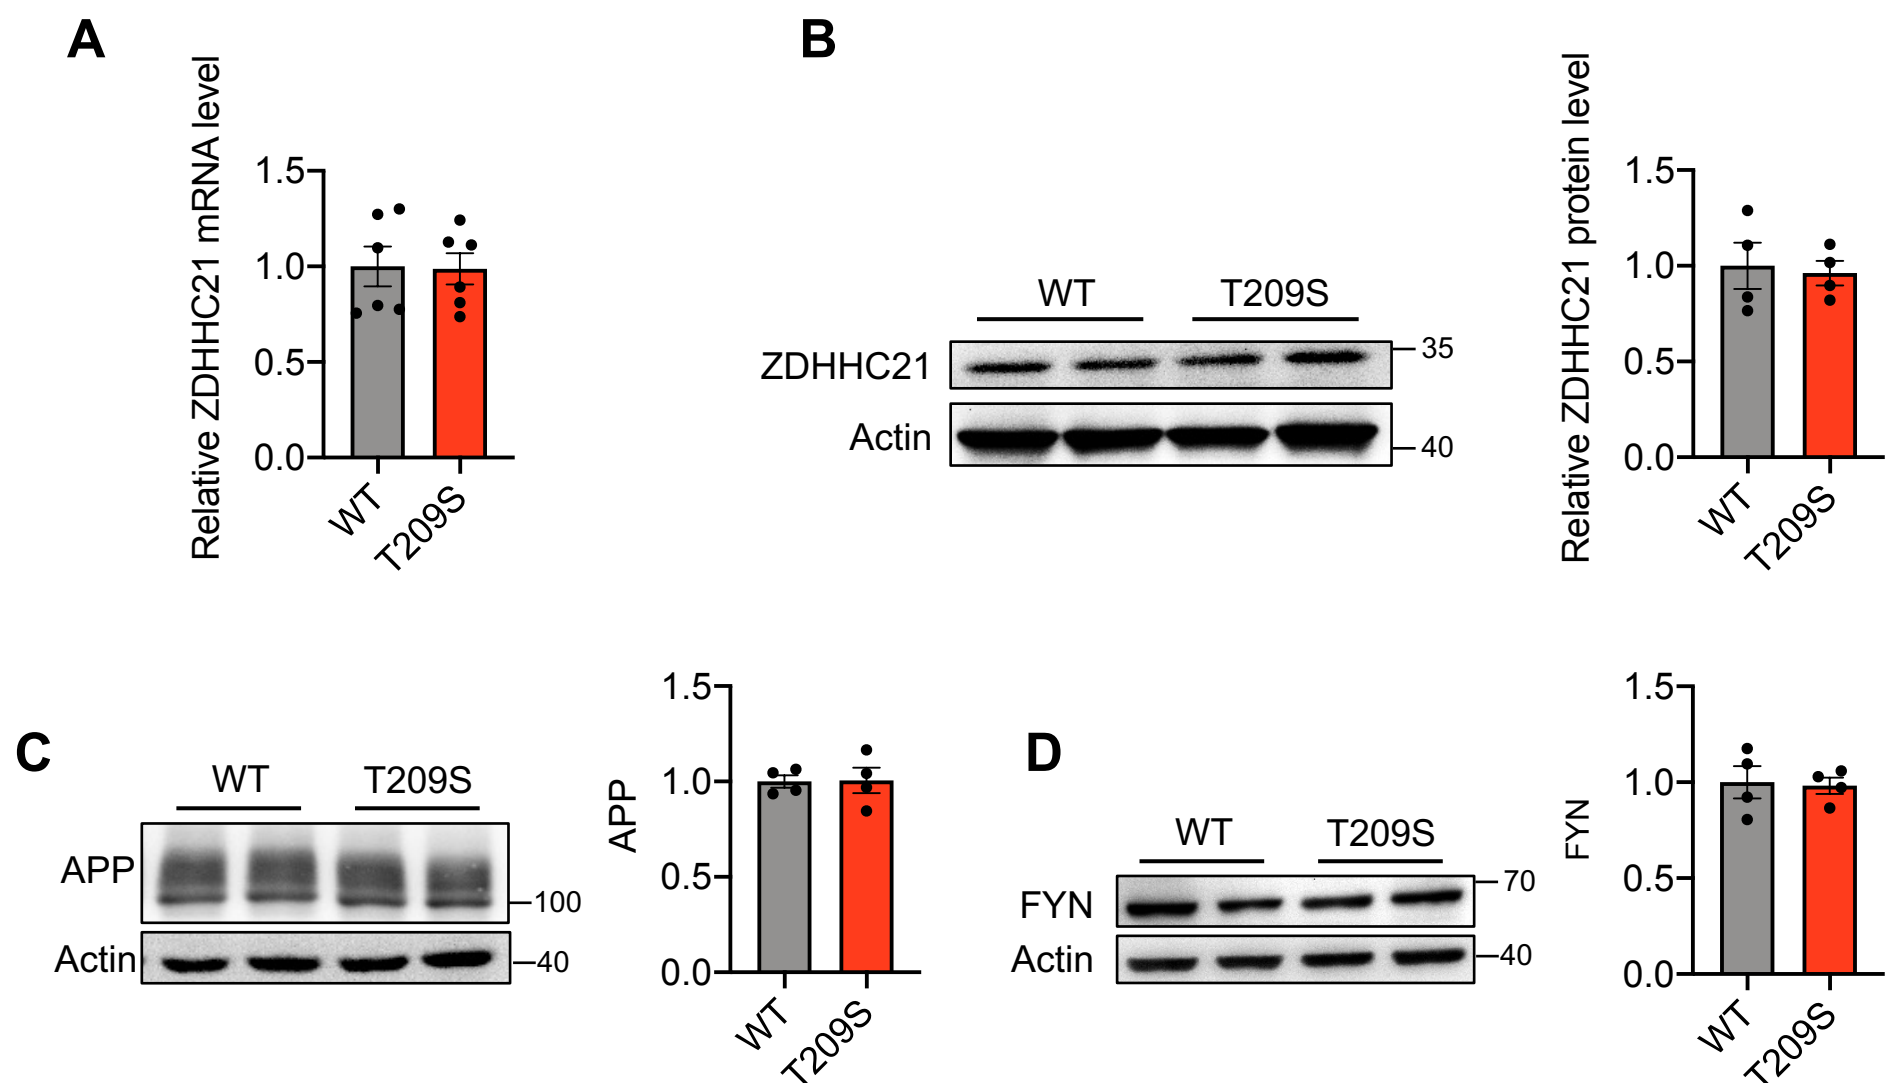

Supplementary Figure 2. The expression of ZDHHC21 (A and B), APP (C) and FYN (D) in WT and ZDHHC21<sup>T209S/T209S</sup> mice. n = 6 mice per group (a), 4 mice per group (b-d); unpaired two-tailed Student's t-tests. Bars represent the mean and error bars represent the SEM.

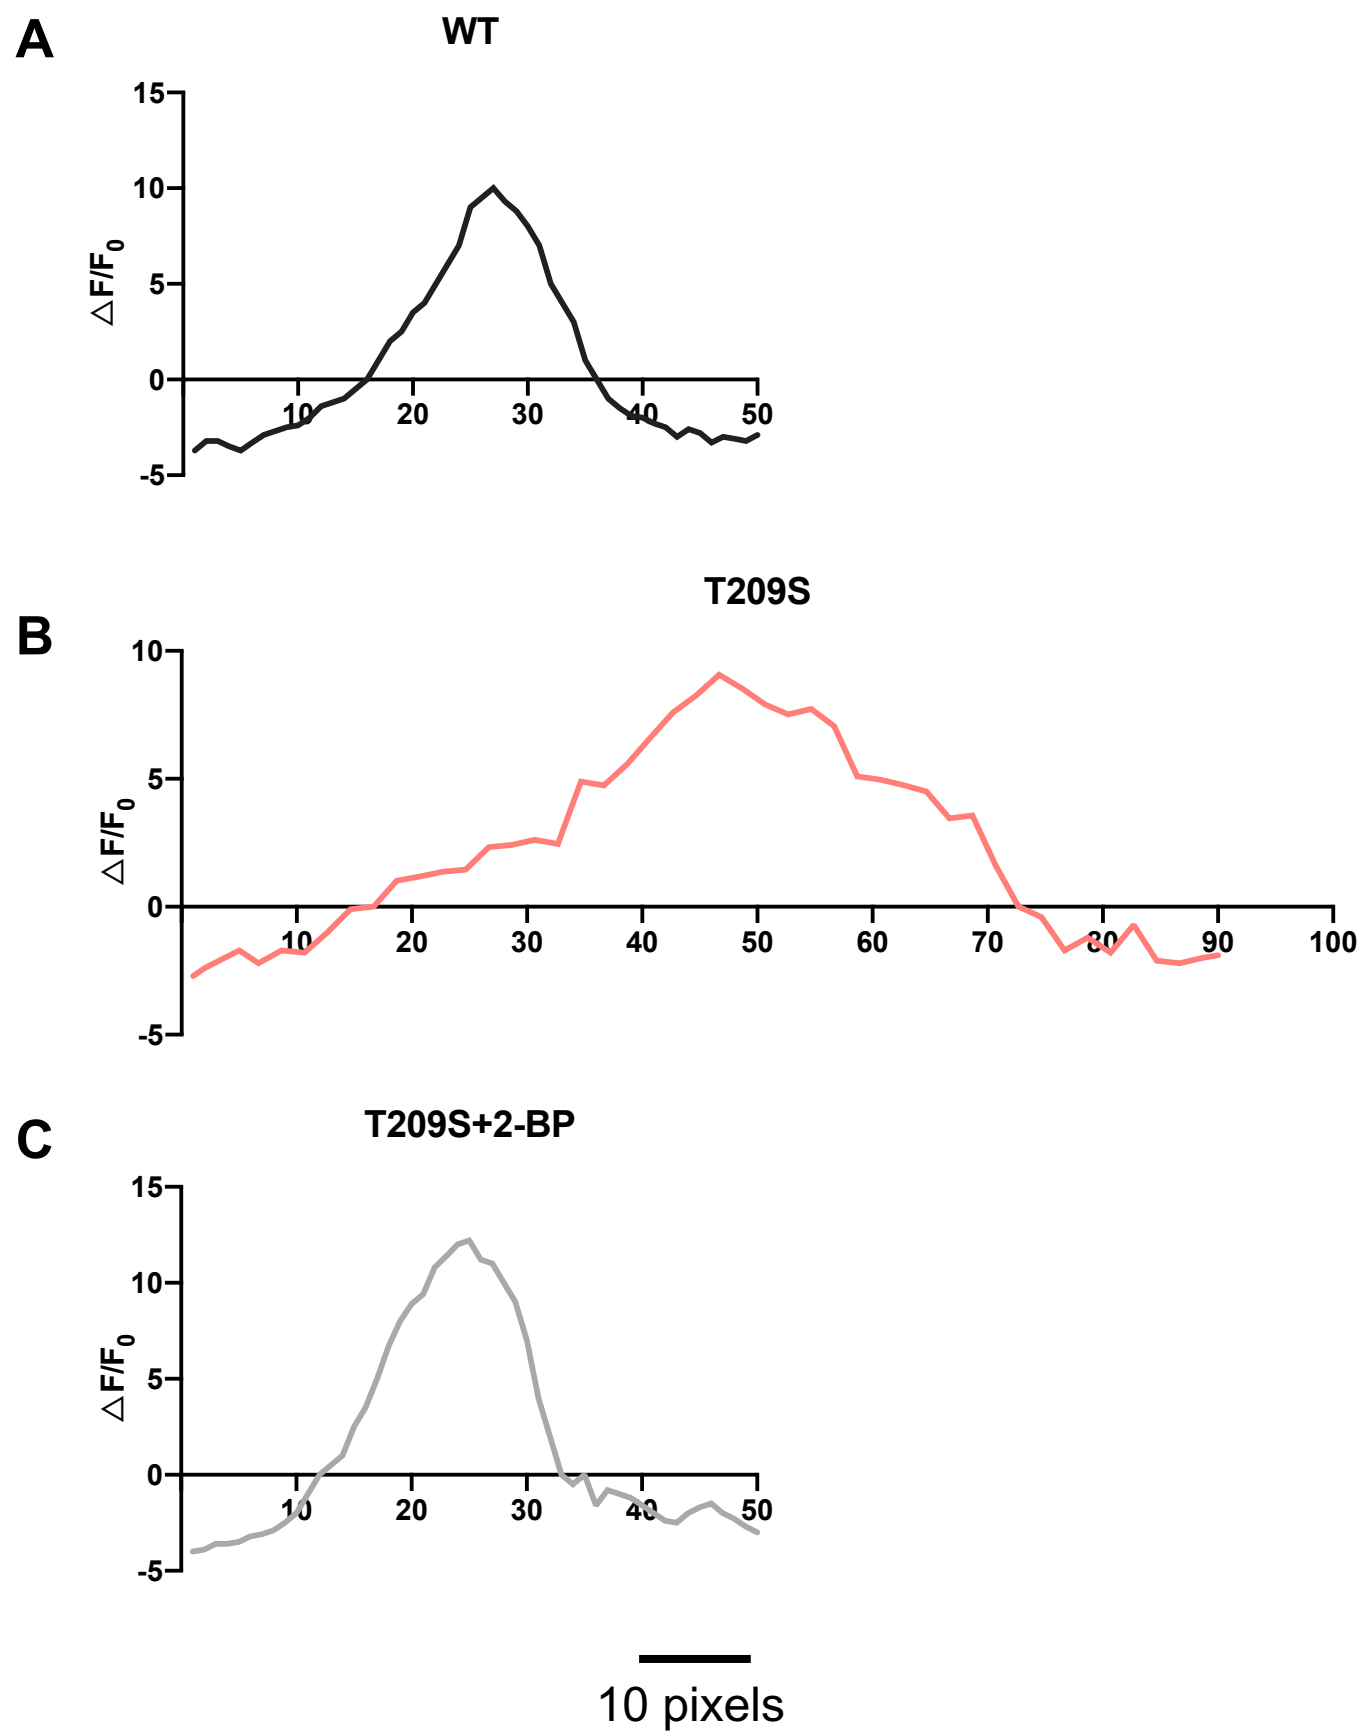

Supplementary Figure 3. Representative traces (averaged  $\Delta F/F_0$  responses) at one synaptic site from WT (A), T209S (B) and T209S+2-BP (C) neurons.
